# Supplementary material for: DFT/CC investigation of physical adsorption on a graphite (0001) surface
Source: Royal Society of Chemistry journal article supplement (doi:10.1039/c001155j), 2010-01-01

## Supplementary information

The DFT/CC method is briefly described in the Section 2 (for more detailed description see Refs. [1-3]). Calculations of the interaction energies used in Eq. [1] (Section 2) for evaluating the DFT/CC corrections at the PBE/AVQZ and CCSD(T)/CBS levels of theory are detailed below.

### *Complete Basis Set (CBS) extrapolation*

The CCSD(T)/CBS estimates are obtained from the simple correlation dependence on the cardinal number  $X$

$$E_X^{cor} = E_{CBS}^{cor} + A \cdot X^{-3}, \quad [1]$$

where  $E^{cor}$  stands for the correlation energy. For uncorrelated part the HF/AV5Z energy is taken as the CBS limit. The CCSD(T)/CBS calculations for the H<sub>2</sub>..A complexes (A = Ar, C<sub>2</sub>H<sub>2</sub>, C<sub>2</sub>H<sub>4</sub>, C<sub>2</sub>H<sub>6</sub>, C<sub>6</sub>H<sub>6</sub>, CH<sub>4</sub>, H<sub>2</sub>, H<sub>2</sub>O, N<sub>2</sub>, NH<sub>3</sub>, CO, CO<sub>2</sub>) were carried out according formula

$$E_{CCSD(T)/CBS} = E_{CCSD(T)/CBS}^{cor}(AVTZ / AVQZ) + E_{HF/AV5Z}. \quad [2]$$

The CCSD(T)/CBS estimates for the benzene..A complexes were obtained as

$$E_{CCSD(T)/CBS} = E_{CCSD(T)/AVDZ}^{cor} + E_{MP2/CBS}^{cor}(AVTZ / AVQZ) - E_{MP2/AVDZ}^{cor} + E_{HF/AV5Z}. \quad [3]$$

### *Monomer geometries*

The CCSD(T)/CBS and PBE/AVQZ calculations were performed with frozen monomer geometries obtained at the CCSD(T)/AVQZ level. The benzene geometry was taken from Ref. [1].

### *Basis sets*

Calculations on the reference set systems were performed with the augmented Dunning's correlation-consistent valence- $X$ - $\zeta$  basis set with polarization functions (AVXZ, see Section 2 for more details). The augmented functions on benzene's hydrogens were stripped in HF/AV5Z calculations. All interaction energies were corrected for the basis set superposition error (BSSE) by standard counterpoise correction of Boys and Bernardi.

### *DFT/CC reference sets*

The DFT/CC reference sets from which the atom-atom correction functions were obtained are given in Figs. [1-9]. One dimensional PES scans were performed for each reference system as indicated by an arrow. The reference sets for H<sub>2</sub>, C<sub>6</sub>H<sub>6</sub>, and H<sub>2</sub>O were reported elsewhere<sup>1-3</sup> and they are not included in Figs. [1-9].

### **References**

- [1] Bludsky O., Rubes M., Soldan P., Nachtigall P., *J. Chem. Phys.*, 2008, **128**, 114102.
- [2] Rubes M., Bludsky O., *Chemphyschem*, 2009, **10**, 1868.
- [3] Rubes M., Nachtigall P., Vondrasek J., Bludsky O., *J. Phys. Chem. C*, 2009, **113**, 8412.

**Figure 1** Reference set for argon atom: Ar..H<sub>2</sub> (*C*<sub>2v</sub>) and Ar..C<sub>6</sub>H<sub>6</sub> (*C*<sub>6v</sub>) complexes.

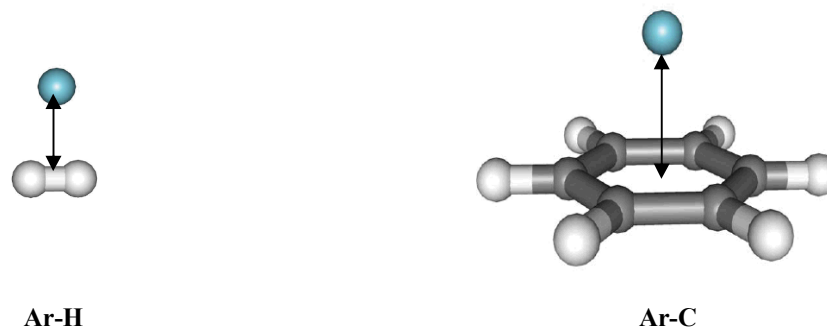

**Figure 2** Reference set for N<sub>2</sub> molecule: N<sub>2</sub>..H<sub>2</sub> (*C*<sub>2v</sub>) and N<sub>2</sub>..C<sub>6</sub>H<sub>6</sub> (*C*<sub>2v</sub>) complexes.

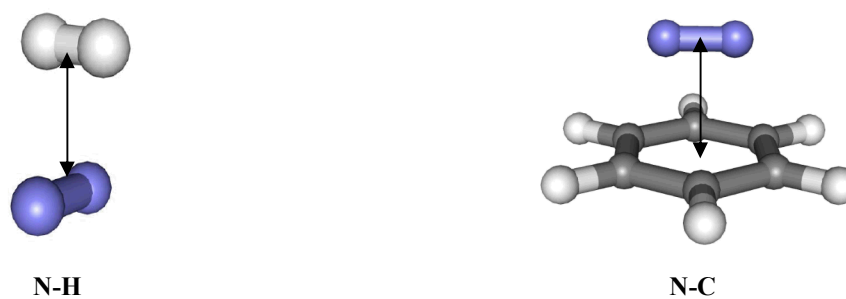

**Figure 3** Reference set for CH<sub>4</sub> molecule: H<sub>2</sub> dimer (*D*<sub>2d</sub>), CH<sub>4</sub>..H<sub>2</sub> (*C*<sub>3v</sub>), C<sub>6</sub>H<sub>6</sub>..H<sub>2</sub> (*C*<sub>6v</sub>), and CH<sub>4</sub>..C<sub>6</sub>H<sub>6</sub> (*C*<sub>3v</sub>) complexes.

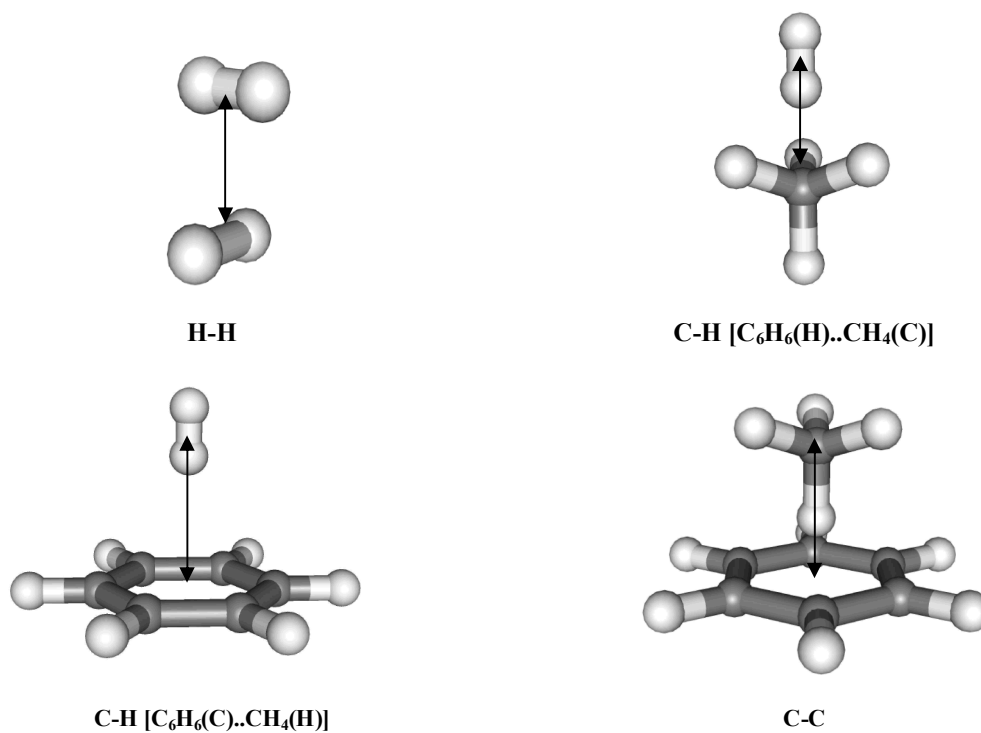

**Figure 4** Reference set for  $C_2H_6$ :  $H_2$  dimer ( $D_{2d}$ ),  $C_2H_6..H_2$  ( $C_{2v}$ ),  $C_6H_6..H_2$  ( $C_{6v}$ ),  $C_6H_6..H_2$  ( $C_{6v}$ ), and  $C_2H_6..C_6H_6$  ( $C_{2v}$ ) complexes.

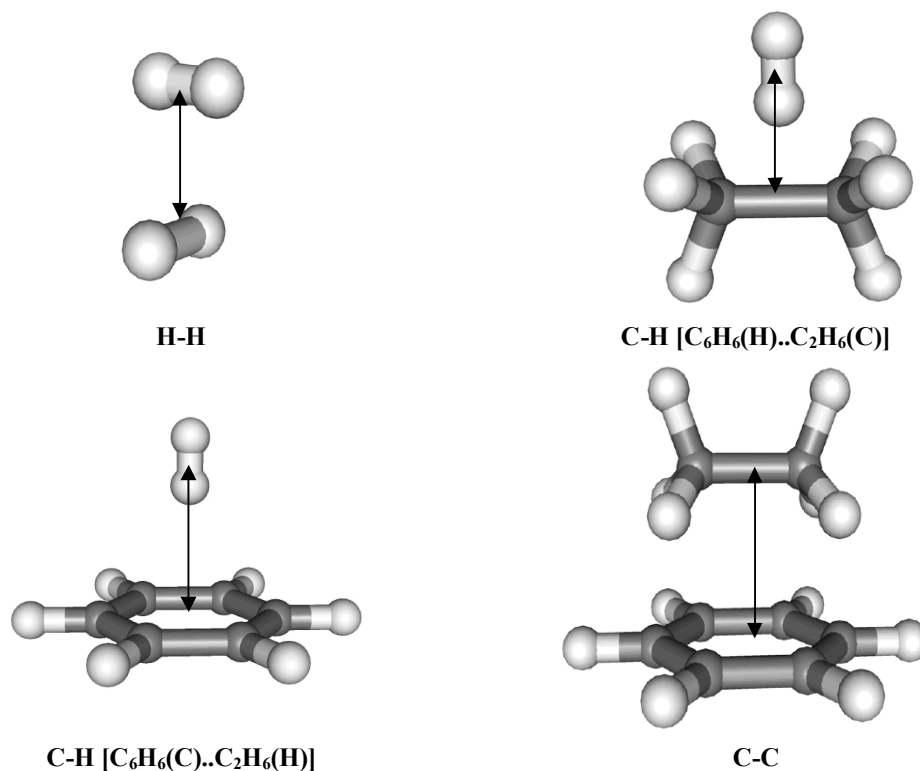

**Figure 5** Reference set for  $C_2H_4$ :  $H_2$  dimer ( $D_{2d}$ ),  $C_2H_4..H_2$  ( $C_{2v}$ ),  $C_6H_6..H_2$  ( $C_{6v}$ ), and  $C_2H_4..C_6H_6$  ( $C_{2v}$ ) complexes.

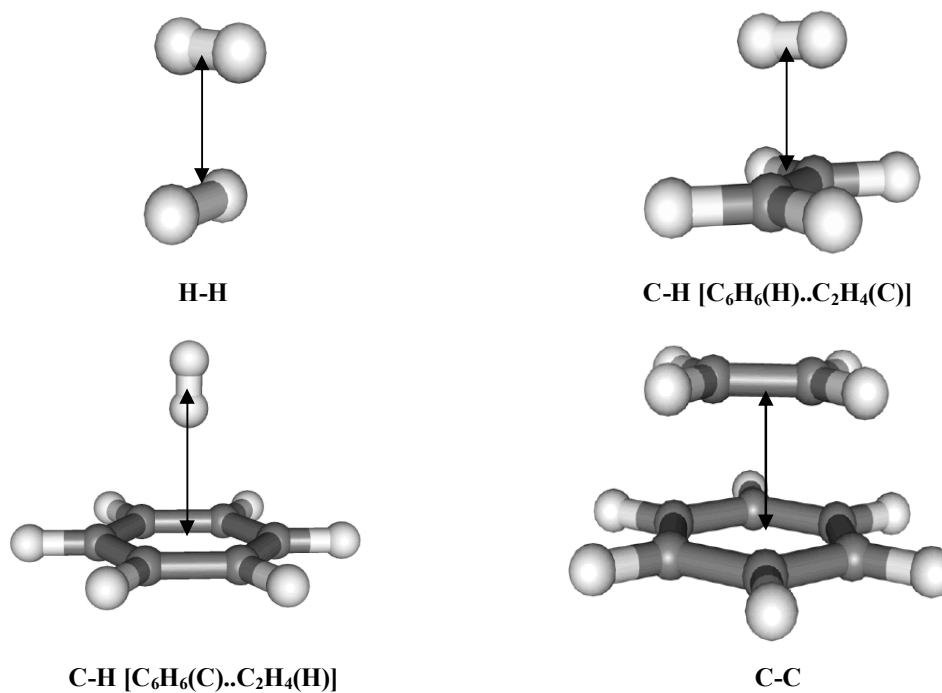

**Figure 6** Reference set for  $C_2H_2$ :  $C_2H_2..H_2$  ( $C_{2v}$ ),  $C_2H_2..H_2$  ( $C_{2v}$ ),  $C_6H_6..H_2$  ( $C_{6v}$ ), and  $C_2H_2..C_6H_6$  ( $C_{2v}$ ) complexes.

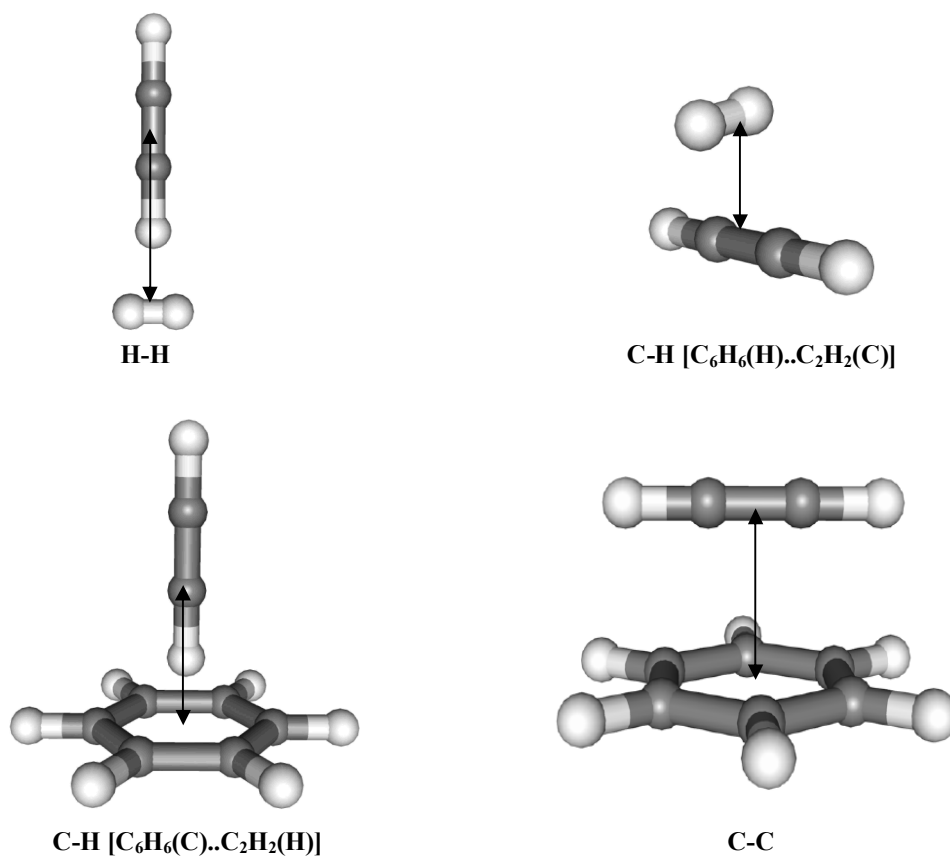

**Figure 7** Reference set for CO:  $CO..H_2$  ( $C_{2v}$ ),  $CO..C_6H_6$  ( $C_{6v}$ ) complexes.

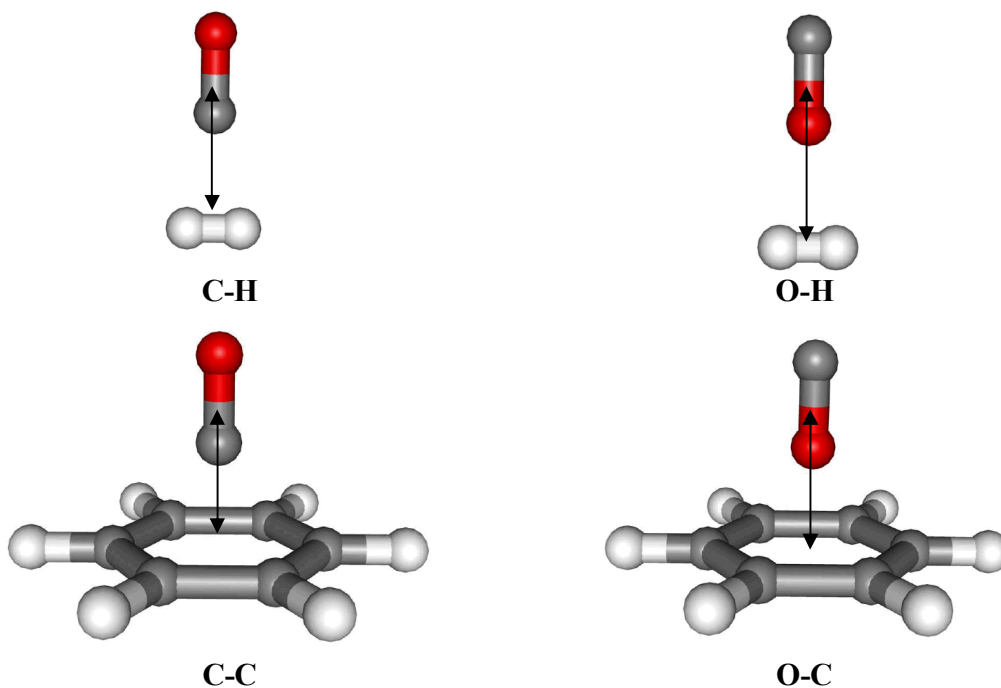

**Figure 8** Reference set for CO<sub>2</sub>: CO<sub>2</sub>..H<sub>2</sub> (C<sub>2v</sub>) and CO<sub>2</sub>..C<sub>6</sub>H<sub>6</sub> (C<sub>2v</sub>,C<sub>6v</sub>) complexes.

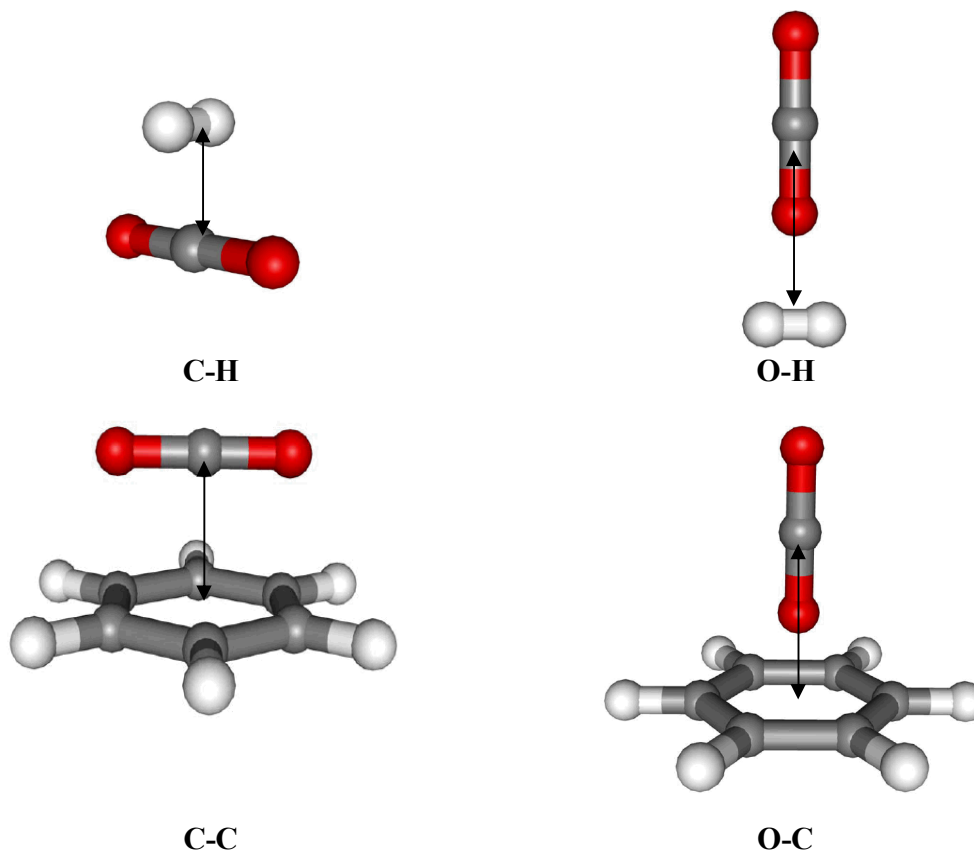

**Figure 9** Reference set for  $\text{NH}_3:\text{H}_2$  dimer ( $D_{2d}$ ),  $\text{NH}_3:\text{H}_2$  ( $C_s$ ), and  $\text{NH}_3:\text{C}_6\text{H}_6$  ( $C_{3v}$ ) complexes.

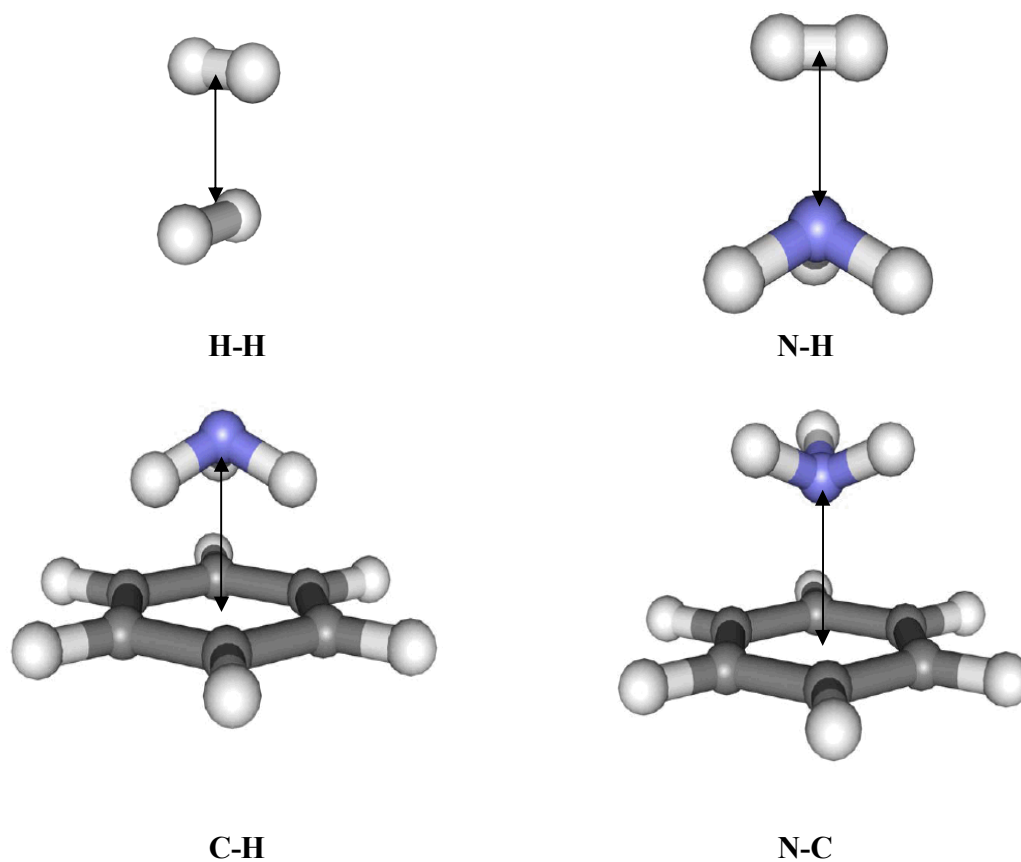

Supplement: c001155j.pdf [file c001155j.pdf]
